# Supplementary figures and images for: Effect of Sprouting on Biomolecular and Antioxidant Features of Common Buckwheat (Fagopyrum esculentum)
Source: MDPI journal article supplement (doi:10.3390/foods12102047), 2023-05-18

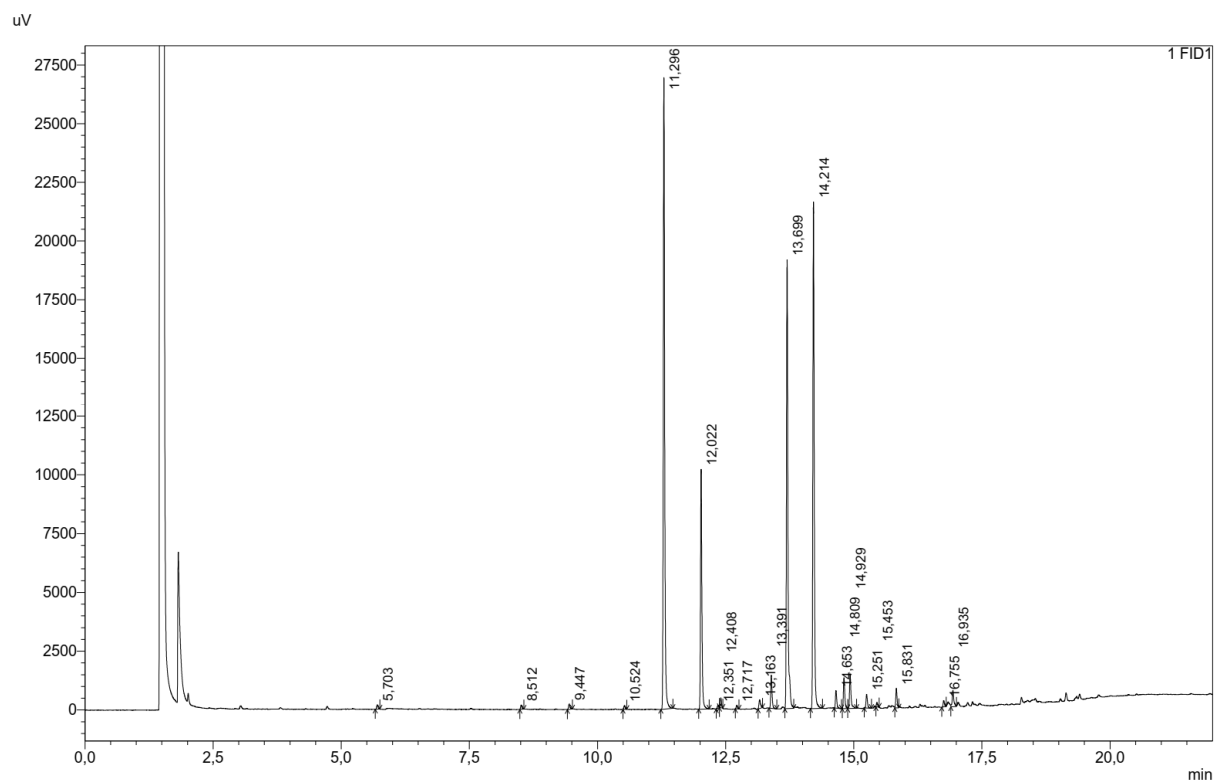

**Figure S1.** Representative chromatogram of BW-0.

Supplement: s1 [file s1]
